# Supplementary material for: Simultaneous CUT&Tag profiling of the accessible and silenced regulome in single cells
Source: bioRxiv or medRxiv preprint supplement (doi:10.1101/2021.12.19.473377), 2021-12-21
Supplement: Supplementary file [file media-1.pdf]

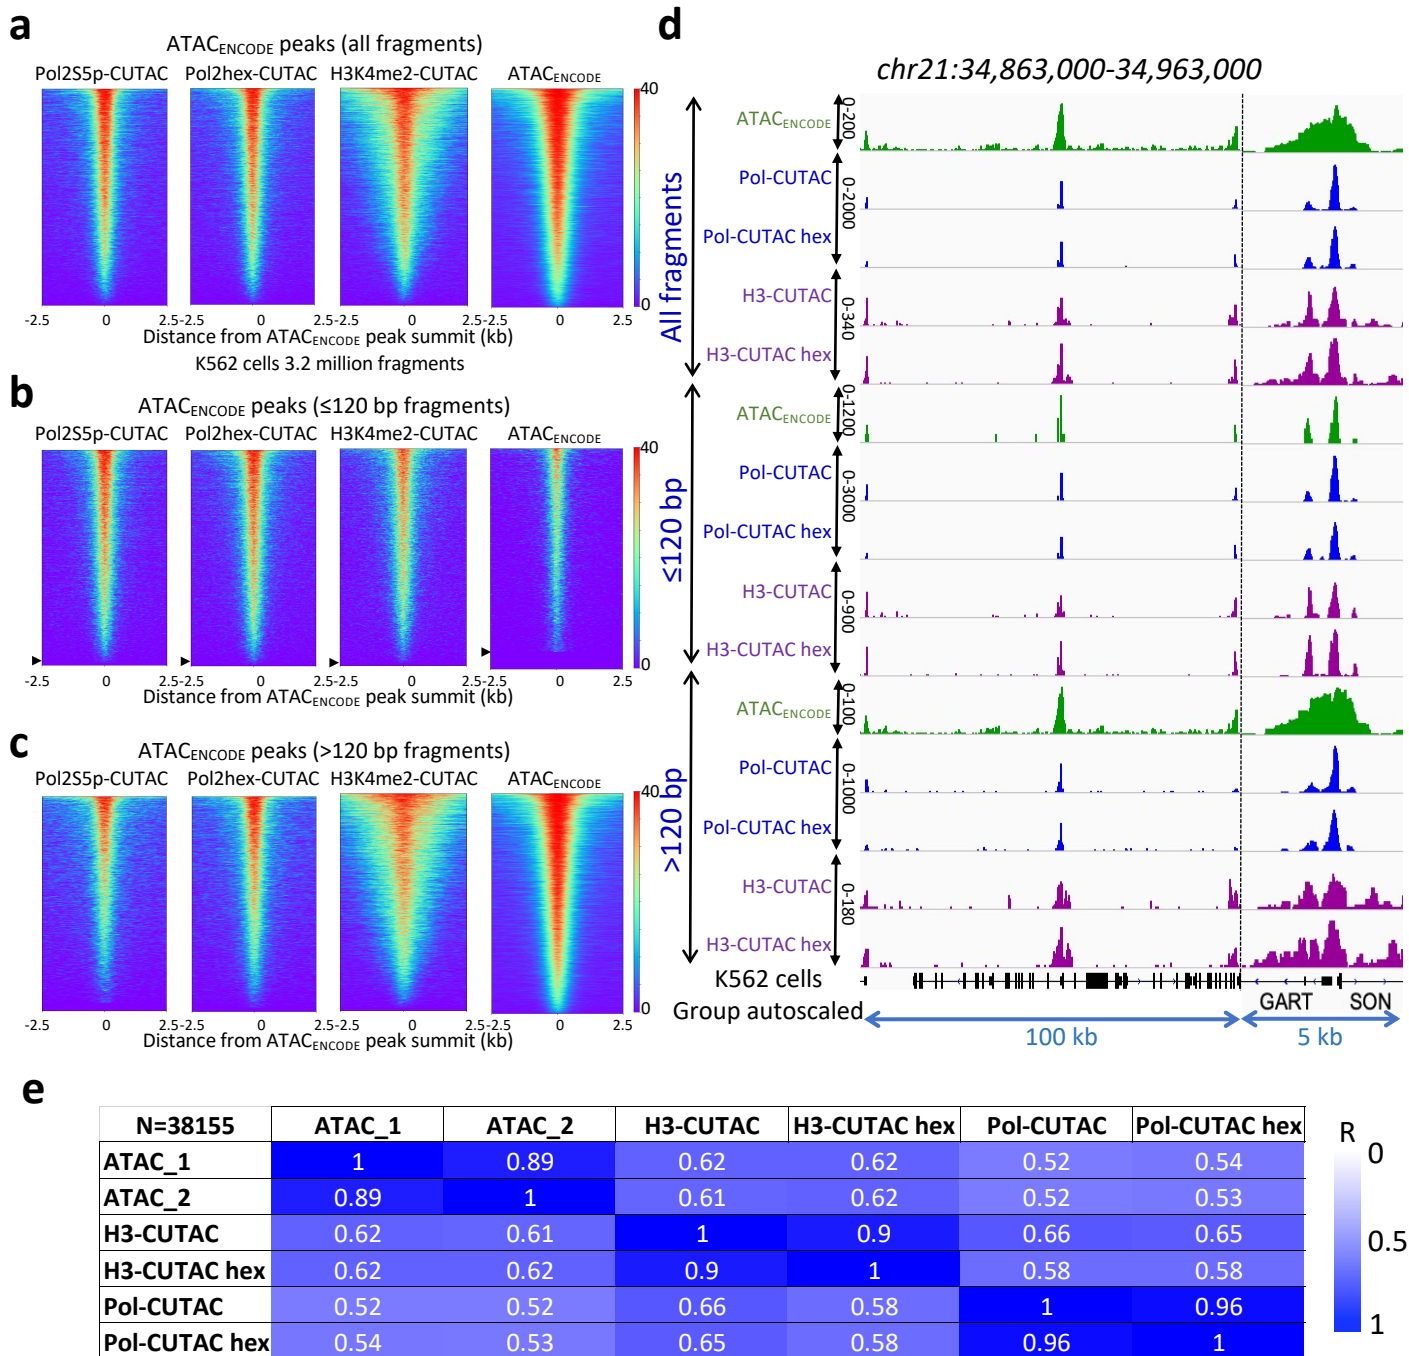

**Additional file 2: Close correspondences between CUTAC and ATAC-seq** (a) Heatmaps showing alignments of Pol2S5p-CUTAC  $\pm 10\%$  1,6-hexanediol during tagmentation, H3K4me2-CUTAC and ATAC<sub>ENCODE</sub> data over peaks called on an ATAC<sub>ENCODE</sub> replicated dataset. (b) Same as (a) showing the  $\leq 120$ -bp fragment subset, where arrowheads indicate the row where enrichment of signal over peaks ends: 98-99% for CUTAC and 93% for ATAC<sub>ENCODE</sub>. (c) Same as (b) showing the  $> 120$  bp subset. Fragments were mapped to hg19, and 3.2 million fragments were randomly sampled from each dataset and used to make bedgraph tracks. (d) Tracks comparing Pol2S5p and H3K4me2 CUTAC to ATAC-seq using K562 cell data generated by the ENCODE project. The region around the GART-SON bidirectional promoter is shown at two different scales. (e) Correlation matrix of CUTAC and ATAC-seq datasets used in this analysis. ATAC\_1 is the ENCODE dataset used to call peaks and ATAC\_2 is a replicate of ATAC\_1.
