# Supplementary material for: Simultaneous CUT&Tag profiling of the accessible and silenced regulome in single cells
Source: bioRxiv or medRxiv preprint supplement (doi:10.1101/2021.12.19.473377), 2021-12-21
Supplement: Supplementary file [file media-5.pdf]

**a** K562

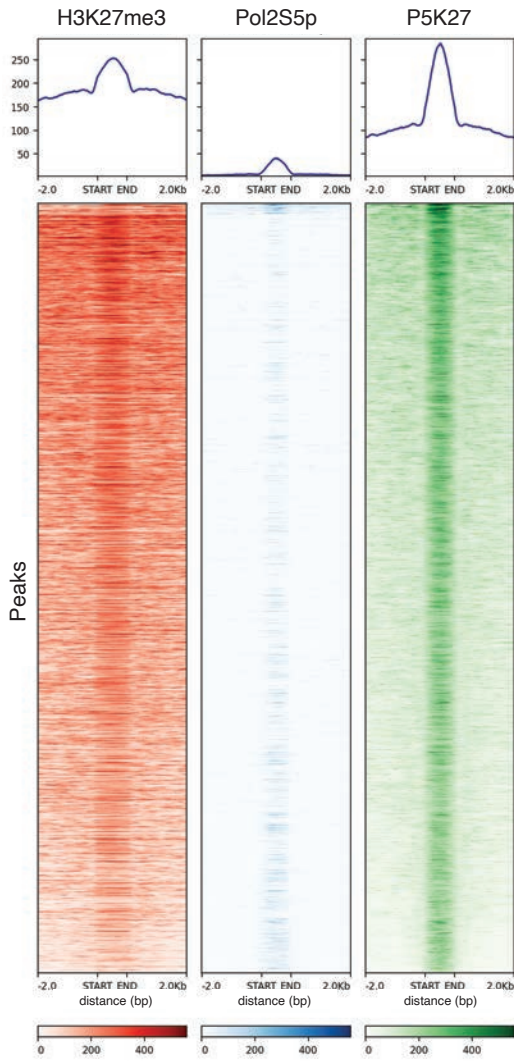

**b** H1-hESC

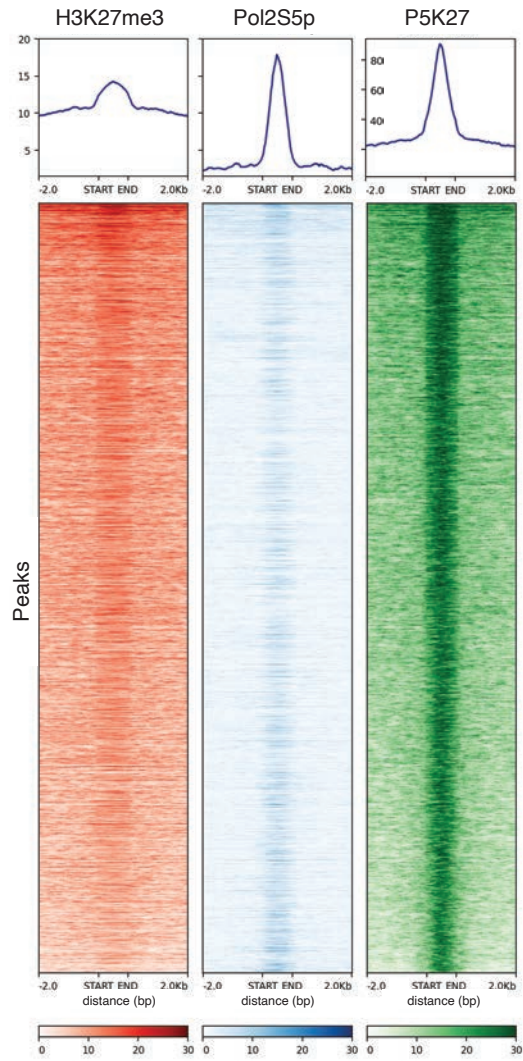

**Additional file 5: (a)** Single antibody and 2for1 data at the overlapping peaks for K562 cells. **(b)** Same as (a), for H1-hESC cells.
